# Supplementary material for: Validation and results of a questionnaire for functional bowel disease in out-patients
Source: Springer Nature journal article supplement (doi:10.1186/1471-2458-2-8), 2002-05-21
Supplement: Additional file 1 [file 1471-2458-2-8-s1.doc]

**Appendix** Rules for the classification of gastrointestinal patients into one of three disease groups derived from a recursive partitioning model.

**1.** Abdominal pain? a)Yes, in upper abdomen…go to **2.**

b)Yes, in lower abdomen…go to **3.**

c)Yes, in entire abdominal area …go to **3.**

d) No/not applicable…go to **3.**

**2.** Loose stools? a)Yes…**Organic disease** (p=0.43)

b)No…go to **4.**

**3.** Age< 64.5 yrs a)Yes…go to **5.**

b)No…go to **6.**

**4.** Pain reflection? a)Yes, to spine…**Organic disease** (p>0.99)

b)No…go to **7.**

c)Yes, but not to spine…go to **7.**

**5.** For how many years

have you had this pain? a)>2 years…**IBS** (p>0.99)

b)<2 years…go to **8.**

c) Not applicable (No abdominal pain)…go to **8.**

**6.** How often do you

have the pain? a) >=1 a week…go to **9.**

b) <1 a week OR n/a (No pain)…**Organic disease** (p=0.80)

**7.** Abdominal distension? a) No… **Organic disease** (p=0.67)

b)Yes…go to **10.**

**8.** Abdominal distension? a) No… **Organic disease** (p=0.67)

b)Yes…**IBS** (p=0.88)

1. Pain relief on

defecation? a) No… **Organic disease** (p=0.67)

b) Yes…**IBS** (p=0.60)

**10.** Age< 54.5 yrs a)Yes…**Functional dyspepsia** (p=0.88)

b)No…go to 11.

**11.** Age< 66.5 yrs a)Yes…**Organic disease** (p=0.6)

b)No… **Functional dyspepsia** (p=0.6).
